# Supplementary material for: In vivo 13C-MRI using SAMBADENA
Source: PubMed Central journal article supplement (PMC6042716; doi:10.1371/journal.pone.0200141), 2018-07-12
Supplement: pone.0200141.s002.pdf [file pone.0200141.s002.pdf]

# *In vivo* $^{13}\text{C}$ -MRI using SAMBADENA

S1 Fig

---

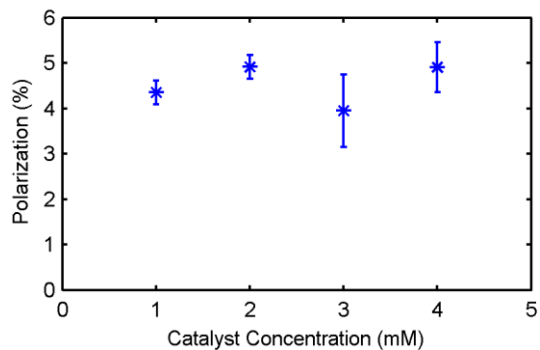

**S1 Fig: Hyperpolarization as function of the concentration of the catalyst:** HP experiments were repeated with different concentrations of the hydrogenation catalyst *in vitro* (concentration  $c_{\text{cat}}$  of 1 mM, 2 mM, 3 mM and 4 mM in  $\text{H}_2\text{O}$ ; concentration of substrate precursor  $c_{\text{HEA}} = 80$  mM, temperature of  $T \approx 80$  °C,  $p\text{H}_2$ -pressure of  $p = 15$  bar, hydrogenation time  $t_{\text{h}} = 8$  s). No significant changes were observed and HP yields were equal within the error intervals. Each data point corresponds to the mean and standard error of  $N = 3$  experiments. ( $P(1 \text{ mM}) = (4.4 \pm 0.3) \%$  ;  $P(2 \text{ mM}) = (4.9 \pm 0.3) \%$  ;  $P(3 \text{ mM}) = (4.0 \pm 0.8) \%$  ;  $P(4 \text{ mM}) = (4.9 \pm 0.6) \%$ ).
