# Supplementary material for: In vivo 13C-MRI using SAMBADENA
Source: PubMed Central journal article supplement (PMC6042716; doi:10.1371/journal.pone.0200141), 2018-07-12
Supplement: pone.0200141.s006.pdf [file pone.0200141.s006.pdf]

# *In vivo* $^{13}\text{C}$ -MRI using SAMBADENA

S5 Fig

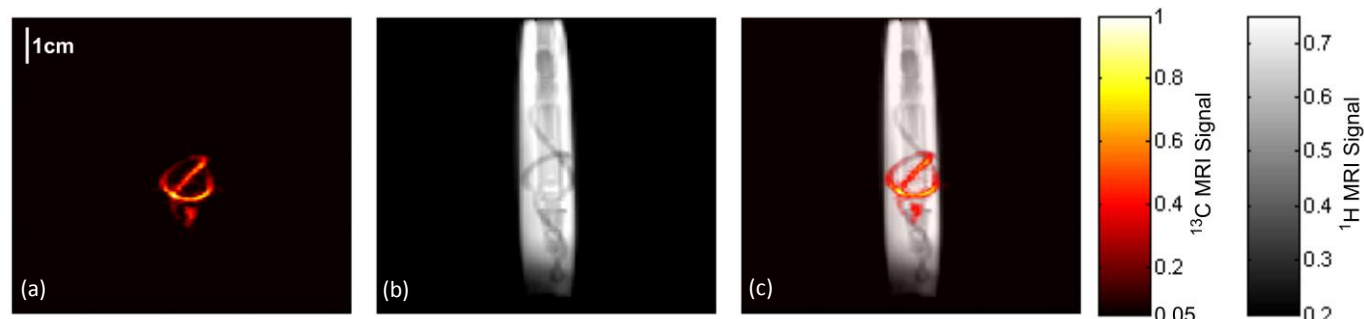

**S5 Fig: *In vitro* MRI with SAMBADENA-produced tracer solution.** The phantom was mounted to the setup as described in S4 Fig and an HP experiment was performed ( $c_{\text{HEA}} = 5 \text{ mM}$ ,  $c_{\text{cat}} = 1 \text{ mM}$ ,  $t_{\text{hyd}} = 5 \text{ s}$ ,  $80 \text{ }^\circ\text{C}$ ,  $15 \text{ bar } p\text{H}_2$ ). The tracer was extracted from the reactor and  $150\mu\text{l}$  were injected into the phantom, similarly to the *in vivo* experiment described in the main text. Subsequently,  $^{13}\text{C}$ -MRI was acquired ((a), co-registered with an  $^1\text{H}$ -MRI (b), which depicted the tracer solution in the tube of the phantom (see S4 Fig) (c). Note that in contrast to *in vivo* experiments,  $^{13}\text{C}$  was recorded using a  $^{13}\text{C}$ -surface coil (S2 Fig). Both,  $^1\text{H}$ - and  $^{13}\text{C}$ -MRI were normalized to the highest signal in the image. A  $5 \text{ mM}$  tracer solution was chosen because concentration and magnetization are similar to *in vivo* experiments ( $300\mu\text{l}$ ,  $80 \text{ mM}$  tracer dilute with  $\sim 2.1 \text{ ml}$  blood of a  $30 \text{ g}$  mouse and yield a final tracer concentration of  $\sim 10 \text{ mM}$  *in vivo*; additionally, as HP of a concentrated sample is lower (see Supplementary Information 1), a  $2 \times$  lower concentration was chosen).  $^{13}\text{C}$ -MRI:  $90/180^\circ$ , RARE-factor: 38, FOV:  $(8.4 \text{ cm})^2$ , acquisition matrix of  $128 \times 96 \text{ px}$ , interpolated to  $256 \times 256 \text{ px}$ , in-plane resolution:  $0.33 \times 0.33 \text{ mm}$ , one slice with thickness:  $6 \text{ cm}$ ,  $T_{\text{R}} = 0.487 \text{ s}$ ,  $T_{\text{E}} = 79 \text{ ms}$ , acquisition time:  $0.487 \text{ s}$ .
