# Supplementary material for: In vivo 13C-MRI using SAMBADENA
Source: PubMed Central journal article supplement (PMC6042716; doi:10.1371/journal.pone.0200141), 2018-07-12
Supplement: pone.0200141.s007.pdf [file pone.0200141.s007.pdf]

# *In vivo* $^{13}\text{C}$ -MRI using SAMBADENA

S6 Fig

---

## Reproducibility of SNR

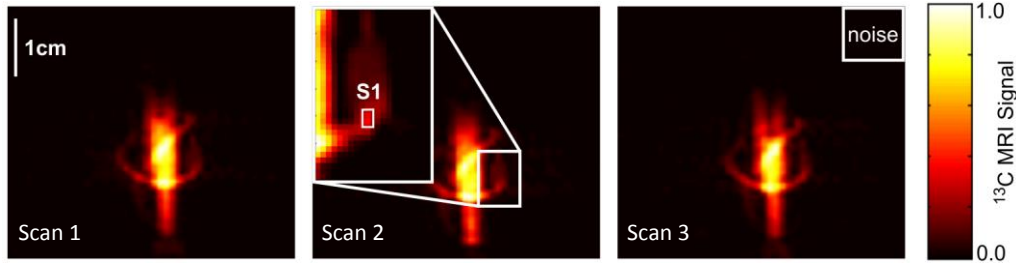

**S6 Fig: Reproducibility of  $^{13}\text{C}$ -MRI and SNR.** The experiment from S5 Fig was repeated three times and 300 $\mu\text{l}$  tracer solution were injected each time. Using the indicated noise region (right) the signal to noise ratio (SNR) was determined in each image at two positions: (a) using the highest signal in the image (SNR<sub>max</sub>) and (b) using a selected region in the catheter, indicated as S1 in the centre image (SNR<sub>cat</sub>). The mean values with corresponding standard deviation of the three scans were determined to SNR1 =  $(418 \pm 72)$  and SNR2 =  $(110 \pm 29)$ .
