# Supplementary material for: In vivo 13C-MRI using SAMBADENA
Source: PubMed Central journal article supplement (PMC6042716; doi:10.1371/journal.pone.0200141), 2018-07-12
Supplement: pone.0200141.s008.pdf [file pone.0200141.s008.pdf]

# *In vivo* $^{13}\text{C}$ -MRI using SAMBADENA

S7 Fig

## *In vivo* MRI

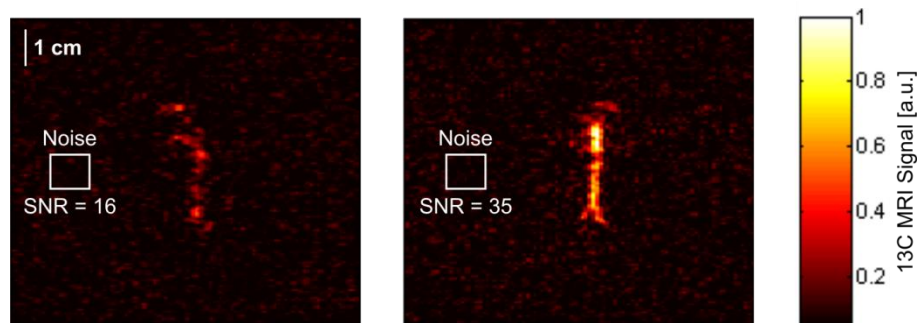

**S7 Fig:**  $^{13}\text{C}$ -MRI of SAMBADENA-polarized hydroxyethyl-propionate *in vivo*. One hyperpolarized batch of 600  $\mu\text{l}$  was used for two separate injections (each 150  $\mu\text{l}$ ) into a 30g mouse via the tail-vein (HP of  $P \approx 5\%$ ,  $c_{\text{HEA}} = 80\text{mM}$ ,  $c_{\text{cat}} = 4\text{mM}$ ; temperature of  $T = (35 \pm 1)^\circ\text{C}$ ). After each injection  $^{13}\text{C}$ -MRI was acquired: first an axial image, 15s after HP with a signal to noise ratio of SNR1=16 (left); next a sagittal image, 30s after HP with SNR2=35 (right). SNR was quantified as highest signal in the image divided by standard deviation of the noise in the indicated region. SNR of the first image was lower, because the catheter was filled with  $\sim 70 - 80 \mu\text{l}$  saline solution before experiments and thus, only  $70 - 80 \mu\text{l}$  of the first injection reached the animal (also see main text). Noise of both images was matched and signal intensities were normalized to the highest signal of the second scan.  $^{13}\text{C}$ -MRI sequence:  $90/180^\circ$ , RARE-factor: 38, FOV:  $(8.4\text{cm})^2$ , acquisition matrix of  $128 \times 96$  px, interpolated to  $128 \times 128$  px, in-plane resolution:  $0.66 \times 0.66$  mm, one slice with thickness: 6 cm,  $T_{\text{R}} = 0.487$  s,  $T_{\text{E}} = 79$  ms, acquisition time: 0.487 s.
